# Supplementary material
Source: Research Square preprint supplement (doi:10.21203/rs.3.rs-9326457/v1)
Supplement: Supplementary file 1 [file 0c5b322a27623c7544bf8bbd.docx]

Table 3. Univariate and Multivariate Analysis of eCCA

| Variables | Univariate Analysis | | | Multivariate Analysis | |
| --- | --- | --- | --- | --- | --- |
| OR (95% CI) | AUC | *p* | OR (95% CI) | *p* |
| Clinical factors |  |  |  |  |  |
| Age | 0.95 (0.89-1.01) | 0.637 (0.478-0.800) | 0.092 |  |  |
| Sex | 0.68 (0.21-2.19) | 0.538 (0.382-0.693) | 0.523 |  |  |
| Tumor size | 1.40 (0.99-1.97) | 0.587 (0.409-0.766) | 0.054 |  |  |
| Imaging factors |  |  |  |  |  |
| CT | 0.99 (0.94-1.04) | 0.504 (0.360-0.648) | 0.583 |  |  |
| Long diameter | 1.09 (0.97-1.22) | 0.628 (0.503-0.753) | 0.165 |  |  |
| Short diameter | 2.20 (1.57-3.09) | 0.872 (0.785-0.959) | < 0.001 | 1.71 (1.17-2.49) | 0.006 |
| Aspect ratio | 0.002 (0-0.06) | 0.844 (0.764-0.924) | < 0.001 | 0.05 (0-1.00) | 0.050 |
| SUVmax | 2.67 (1.59-4.49) | 0.813 (0.728-0.898) | < 0.001 | 2.19 (1.14-4.19) | 0.018 |
| SUVliver | 1.38 (0.56-3.38) | 0.535 (0.406-0.664) | 0.479 |  |  |
| SUVaorta | 2.49 (1.06-5.88) | 0.648 (0.530-0.766) | 0.037 |  |  |
| SUVprimary | 0.91 (0.78-1.06) | 0.518 (0.390-0.645) | 0.235 |  |  |
| TBR | 15.78 (3.48-71.49) | 0.814 (0.731-0.897) | < 0.001 |  |  |
| TBR3 | 2.92(1.10-7.73) | 0.732 (0.618-0.846) | 0.032 |  |  |
| TBR2 | 2.99 (1.35-6.61) | 0.742 (0.638-0.846) | 0.007 |  |  |
| MTV | 1.00 (1.00-1.002) | 0.837 (0.745-0.929) | 0.001 |  |  |
| TLG | 1.00 (1.00-1.00) | 0.852 (0.775-0.930) | 0.003 |  |  |

CI: confidence interval; MTV: metabolic tumor volume; OR: odd ratio; SUVliver: liver SUVmax; SUVprimary: primary lesion SUVmax; SUVaorta: abdominal aorta SUVmax; TBR: SUVmax/SUVliver; TBR2: SUVmax/SUVaorta; TBR3: SUVmax/SUVprimary; TLG: total lesion glycolysis.
