# Supplementary material
Source: Research Square preprint supplement (doi:10.21203/rs.3.rs-9326457/v1)
Supplement: Supplementary file 2 [file 324cac430d0fa3c0ac5338c5.docx]

Table 5. Univariate and Multivariate Analysis of pCCA

| Variables | Univariate Analysis | *p* | Multivariable Analysis | *p* |
| --- | --- | --- | --- | --- |
|  | OR (95% CI) |  | OR (95% CI) |  |
| Clinical factors |  |  |  |  |
| Age | 1.00 (0.92-1.01) | 0.926 |  |  |
| Sex | 0.39 (0.08-1.78) | 0.222 |  |  |
| Tumor size | 1.95 (0.98-3.86) | 0.057 |  |  |
| Imaging factors |  |  |  |  |
| CT | 0.99 (0.92-1.08) | 0.883 |  |  |
| Long diameter | 1.14 (0.92-1.42) | 0.223 |  |  |
| Short diameter | 2.25 (1.30-3.91) | 0.004 |  |  |
| Aspect ratio | 0.001 (0-0.40) | 0.025 | 0 (0-6.34*107) | 0.294 |
| SUVmax | 7.15 (1.93-26.62) | 0.003 |  |  |
| SUVliver | 3.99 (0.76-21.04) | 0.103 |  |  |
| SUVaorta | 7.54 (1.41-40.45) | 0.018 |  |  |
| SUVprimary | 0.89 (0.69-1.16) | 0.402 |  |  |
| TBR | 935.51 (8.30-105395) | 0.005 |  |  |
| TBR3 | 82.65 (2.25-3030.61) | 0.016 |  |  |
| TBR2 | 15.14 (1.47-155.51) | 0.022 |  |  |
| MTV | 1.004 (1.001-1.007) | 0.005 |  |  |
| TLG | 1.002 (1.00-1.003) | 0.01 | 1.009 (0.99-1.03) | 0.314 |

CI: confidence interval; MTV: metabolic tumor volume; OR: odd ratio; SUVliver: liver SUVmax; SUVprimary: primary lesion SUVmax; SUVaorta: abdominal aorta SUVmax; TBR: SUVmax/SUVliver; TBR2: SUVmax/SUVaorta; TBR3: SUVmax/SUVprimary; TLG: total lesion glycolysis.
