# Supplementary material
Source: Research Square preprint supplement (doi:10.21203/rs.3.rs-9326457/v1)
Supplement: Supplementary file 3 [file 5839100847cd1678b93e43b7.docx]

Table 1. Demographic data on the patients under study

| Variables |  | Total | Absence | Present | *p* |
| --- | --- | --- | --- | --- | --- |
| n |  | 71 | 52 | 19 |  |
| Age |  | 62.9 ± 7.1 | 63.9 ± 8.5 | 59.7 ± 10.0 | 0.079 |
| Sex | male | 51 | 38 (74.51%) | 13 (25.49%) | 0.522 |
|  | female | 18 | 12 (66.7%) | 6 (33.3%) |  |
| Tumor size (cm) | | 2.46 ± 1.67 | 2.21 ± 1.13 | 3.15 ± 2.57 | 0.263 |
| Tumor type | pCCA | 35 | 25 (71.43) | 10 (28.57) | 0.096 |
|  | dCCA | 28 | 23 (82.14) | 5 (17.86) |  |
|  | GBC | 4 | 1 (25.00) | 3 (75.00) |  |
|  | ampullary carcinoma | 2 | 1 (50.00) | 1 (50.00) |  |

dCCA: distal cholangiocarcinoma; GBC: gallbladder cancer; pCCA: perihilar cholangiocarcinoma.
