# Supplementary material
Source: Research Square preprint supplement (doi:10.21203/rs.3.rs-9326457/v1)
Supplement: Supplementary file 4 [file 6423e00161f386f4a1d77e52.docx]

**Sulp.table 1 Univariate and Multivariate Analysis of dCCA**

| Variables | Univariate Analysis | *p* | Multivariable Analysis | *p* |
| --- | --- | --- | --- | --- |
|  | Odd Ratio (95% CI) |  | Odd Ratio (95% CI) |  |
| Clinical factors |  |  |  |  |
| Age | 0.91 (0.81-1.03) | 0.155 |  |  |
| Sex | 1.11 (0.10-12.31) | 0.932 |  |  |
| Tumor size | 0.48 (0.08-2.96) | 0.426 |  |  |
| Imaging factors |  |  |  |  |
| CT | 0.98 (0.89-1.08) | 0.716 |  |  |
| Long diameter | 1.03 (0.80-1.33) | 0.828 |  |  |
| Short diameter | 1.73 (0.96-3.13) | 0.068 | 1.73 (0.96-3.13) | 0.068 |
| Aspect ratio | 0.09 (0.002-4.14) | 0.214 |  |  |
| SUVmax | 0.98 (0.57-1.69) | 0.952 |  |  |
| SUVliver | 0.41 (0.04-3.74) | 0.426 |  |  |
| SUVaorta | 0.78 (0.13-4.84) | 0.791 |  |  |
| SUVprimary | 0.90 (0.65-1.24) | 0.517 |  |  |
| TBR3 | 1.73 (0.33-8.99) | 0.517 |  |  |
| TBR2 | 1.85 (0.48-7.12) | 0.369 |  |  |
| MTV | 1.00 (1.00-1.003) | 0.183 |  |  |
| TLG | 1.00 (1.00-1.001) | 0.223 |  |  |
| TBR | 4.93 (0.38-63.13) | 0.220 |  |  |
