# Supplementary material
Source: Research Square preprint supplement (doi:10.21203/rs.3.rs-9326457/v1)
Supplement: Supplementary file 5 [file 713ca560646c672a9a79abea.docx]

Table 4. The AUC of the multivariate regression model for eCCA

| Cohort | AUC | *p* | 95% CI | Sensitivity | Specificity |
| --- | --- | --- | --- | --- | --- |
| eCCA | 0.932 | < 0.0001 | 0.878-0.986 | 87.5% | 90.3% |
| pCCA | 0.991 | < 0.001 | 0.917-1.000 | 90% | 95.8% |
| dCCA | 0.783 | 0.051 | 0.584-0.981 | 80% | 69.6% |

AUC: area under curve; CI: confidence interval; dCCA: distal cholangiocarcinoma; eCCA: extrahepatic cholangiocarcinoma; pCCA: perihilar cholangiocarcinoma.
