# Supplementary material
Source: Research Square preprint supplement (doi:10.21203/rs.3.rs-9326457/v1)
Supplement: Supplementary file 6 [file c23afbd3b6c28c1a51d2cd3f.docx]

Table 6. The AUC of the multivariate regression model for pCCA

| AUC | *P* | 95% CI | Sensitivity | Specificity |
| --- | --- | --- | --- | --- |
| 0.991 | < 0.001 | 0.969-1.000 | 100% | 91.3% |

AUC: area under curve; CI: confidence interval; pCCA: perihilar cholangiocarcinoma.
