# Supplementary material
Source: Research Square preprint supplement (doi:10.21203/rs.3.rs-9326457/v1)
Supplement: Supplementary file 7 [file da92b9eeda3a03fbb011ef76.docx]

Table 2. Differences in the distribution of imaging data

| Variables | Average | Lymph node metastasis | | *p* |
| --- | --- | --- | --- | --- |
| Absence | Present |
| CT | 31.8 ± 9.4 | 32.2 ± 8.9 | 30.9 ± 10.8 | 0.587 |
| Long diameters (mm) | 12.2 ± 3.8 | 11.9 ± 4.0 | 13.2 ± 3.3 | 0.061 |
| Short diameters (mm) | 8.4 ± 2.7 | 7.5 ± 1.8 | 11.3 ± 2.8 | < 0.001 |
| Aspect ratio | 1.5 ± 0.5 | 1.6 ± 0.5 | 1.2 ± 0.1 | < 0.001 |
| SUVmax | 2.7 ± 1.5 | 2.3 ± 1.0 | 3.8 ± 2.2 | < 0.001 |
| SUVprimary | 5.9 ± 3.8 | 6.1 ± 4.1 | 5.0 ± 2.5 | 0.578 |
| SUVliver | 3.3 ± 0.5 | 3.2 ± 0.5 | 3.3 ± 0.5 | 0.483 |
| SUVaorta | 2.0 ± 0.6 | 2.0 ± 0.6 | 2.2 ± 0.5 | 0.033 |
| TBR | 0.8 ± 0.4 | 0.7 ± 0.3 | 1.14 ± 0.6 | < 0.001 |
| TBR2 | 1.3 ± 0.7 | 1.2 ± 0.6 | 1.7 ± 0.7 | < 0.001 |
| TBR3 | 0.6 ± 0.6 | 0.5 ± 0.4 | 0.9 ± 0.8 | 0.001 |
| MTV | 895.5 ± 900.5 | 678.3 ± 654.6 | 1575.6 ± 1175.8 | < 0.001 |
| TLG | 1972.4 ± 2806.0 | 1293.7 ± 1733.3 | 4008.5 ± 4180.9 | < 0.001 |

MTV: metabolic tumor volume; SUVliver: liver SUVmax; SUVprimary: primary lesion SUVmax; SUVaorta: abdominal aorta SUVmax; TBR: SUVmax/SUVliver; TBR2: SUVmax/SUVaorta; TBR3: SUVmax/SUVprimary; TLG: total lesion glycolysis.
